# Supplementary material for: Gut Microbiome in Chronic Coronary Syndrome Patients
Source: MDPI journal article supplement (doi:10.3390/jcm10215074), 2021-10-29
Supplement: s1 [file s1]

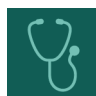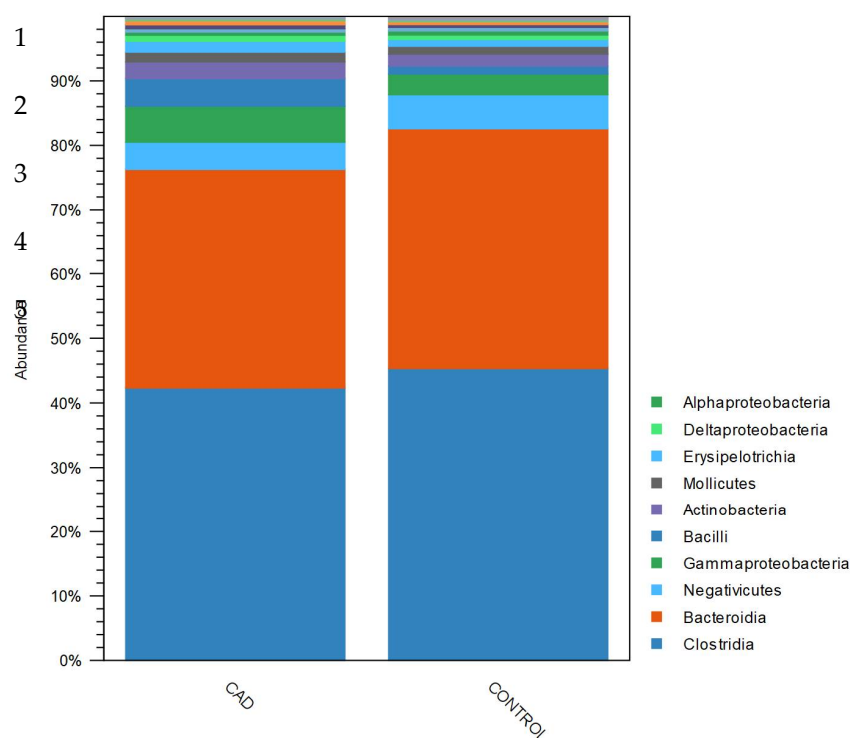

**Supplementary Figure S1.** Composition of bacteria class in studied populations. CAD – coronary artery disease group. 6 7

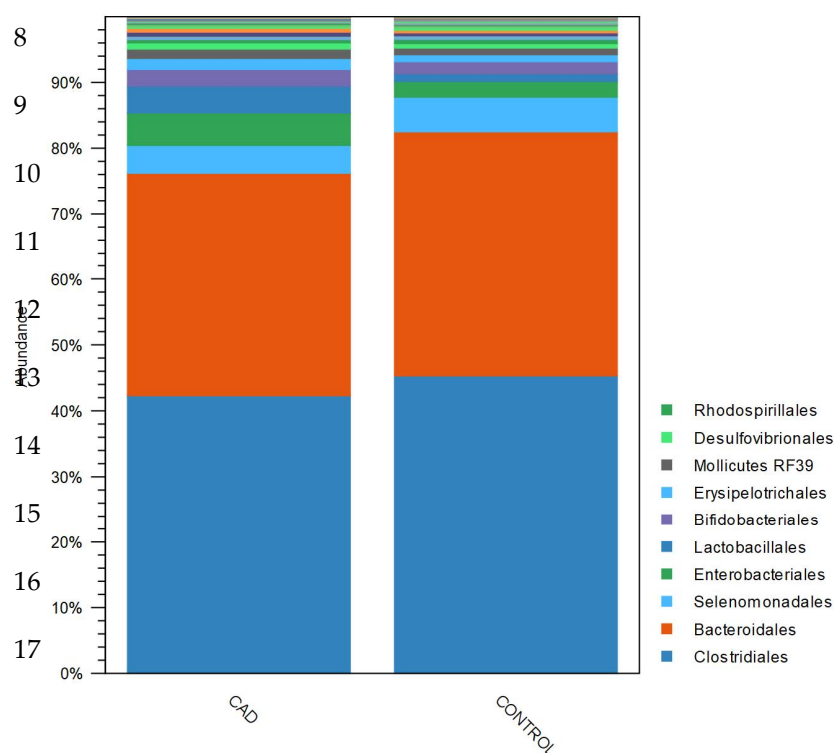

**Supplementary Figure S2.** Composition of bacteria order in studied populations. CAD – coronary artery disease group. 18 19

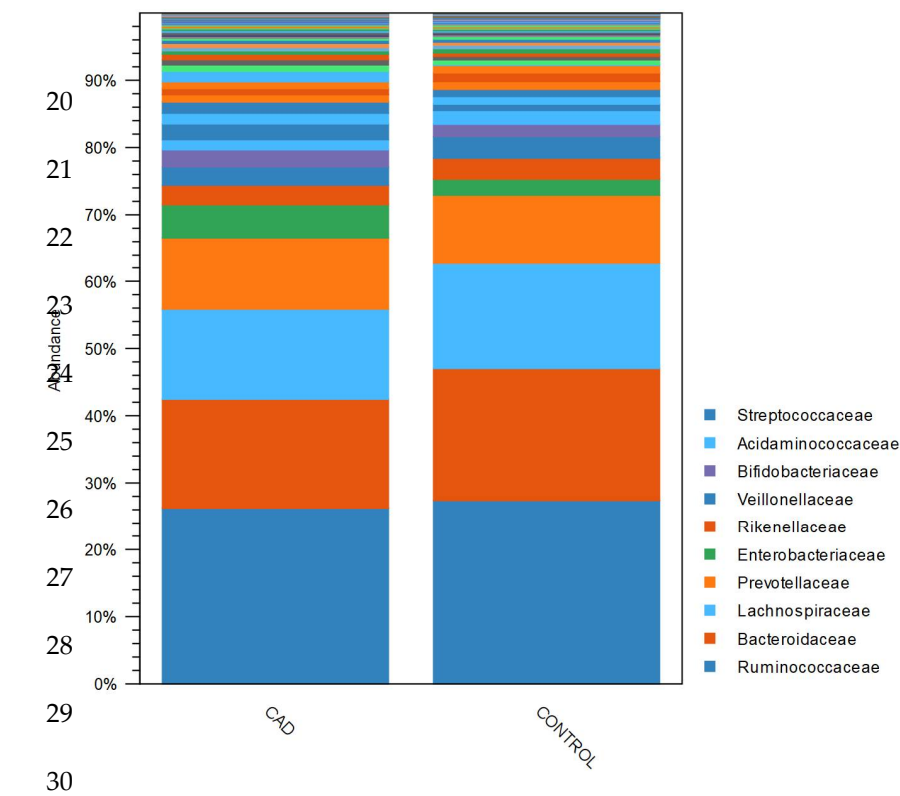

Supplementary Figure S3. Composition of bacteria family in studied populations. CAD – coronary artery disease group.

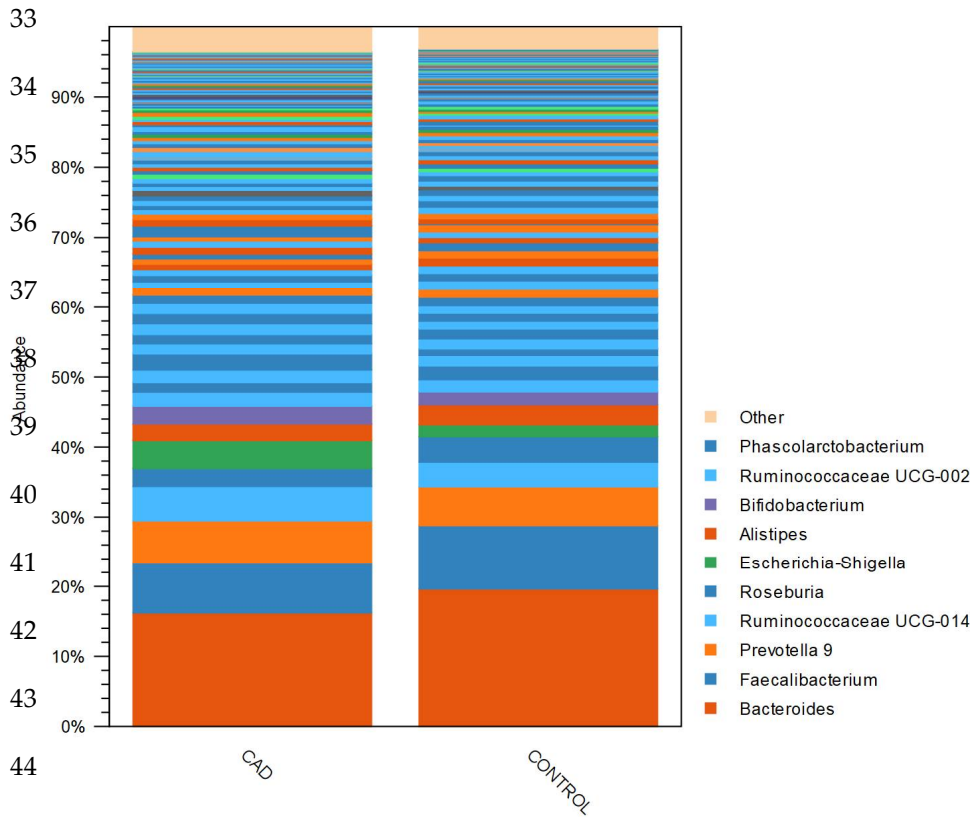

Supplementary Figure S4. Composition of bacteria genus in studied populations. CAD – coronary artery disease group.

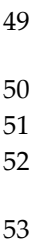

**Supplementary Figure S5.** Potential biomarkers for coronary artery disease and control group at the taxonomic level. LEfSe identified the major bacteria at all taxonomic levels at the threshold of absolute LDA score 2.

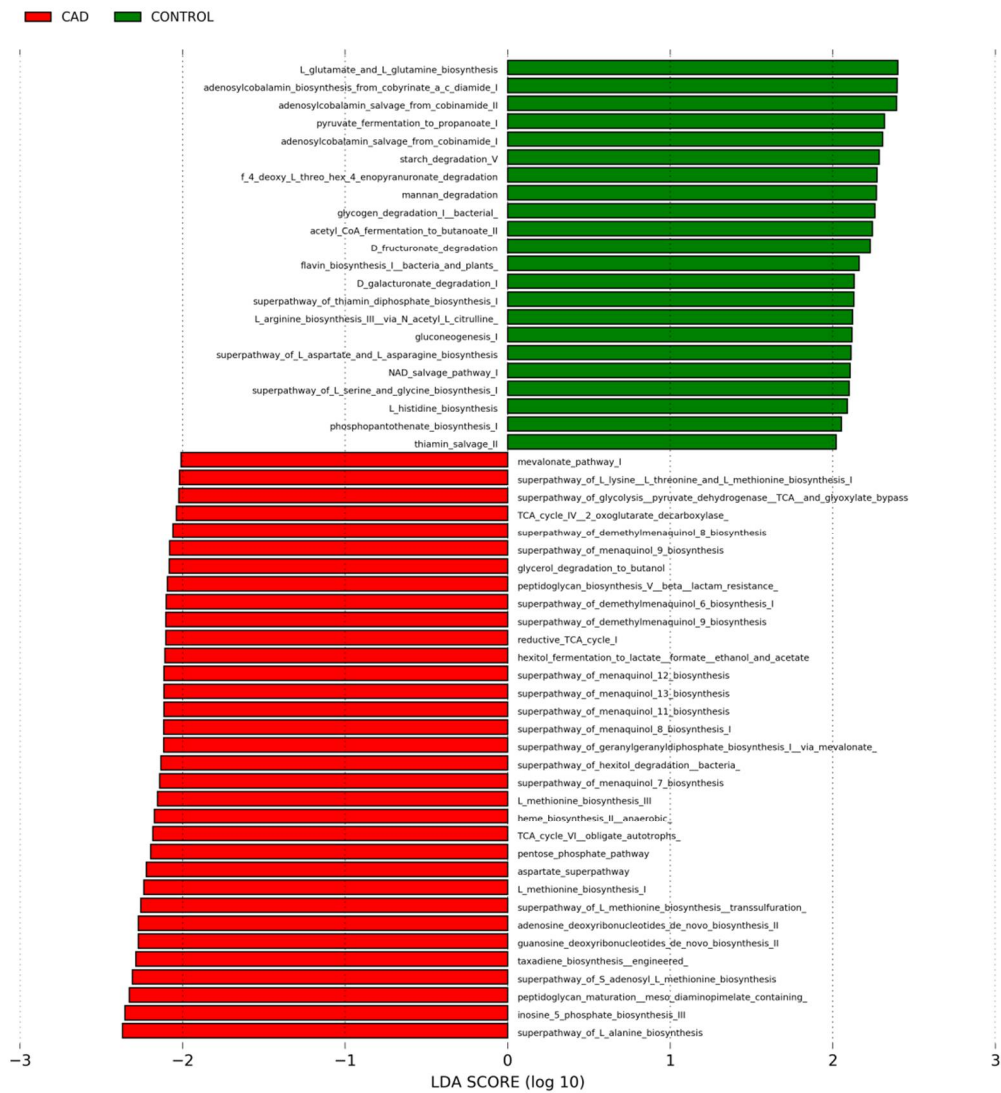

**Supplementary Figure S6.** Potential biomarkers for coronary artery disease and control group at pathways level. LEfSe identified the major bacteria at all taxonomic levels at the threshold of absolute LDA score 2.

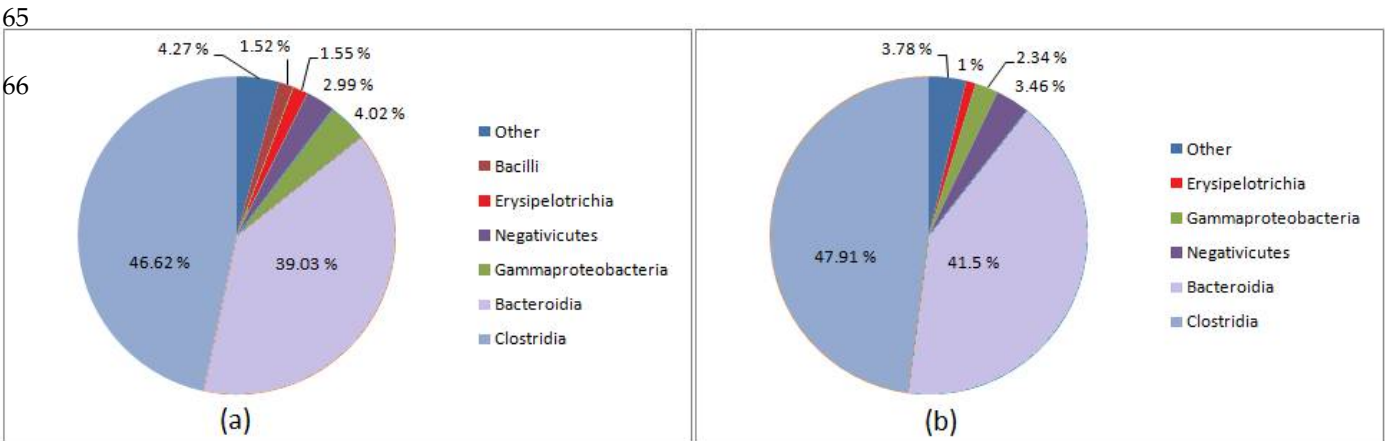

Supplementary Figure S7. Potential DNA topoisomerase producers in coronary artery disease patients (a) and control group (b).

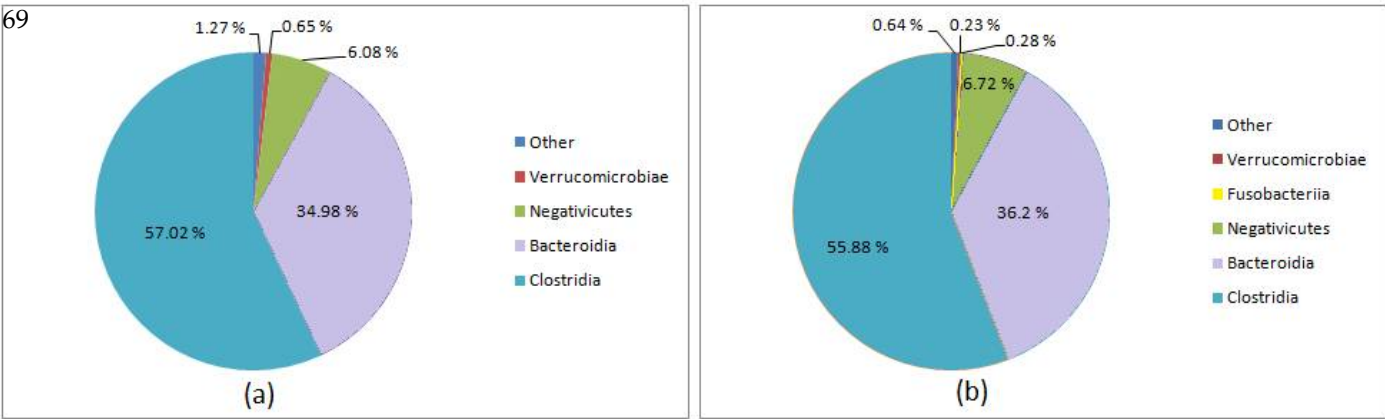

Supplementary Figure S8. Potential oxaloacetate decarboxylase producers in coronary artery disease patients (a) and control group (b).

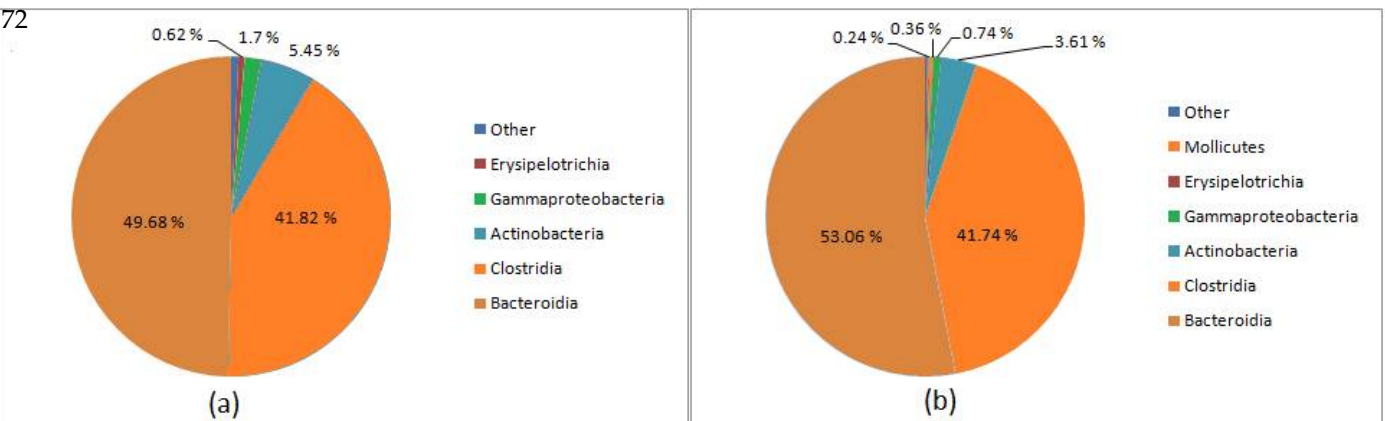

Supplementary Figure S9. Potential beta-glucosidase producers in coronary artery disease patients (a) and control group (b).

77

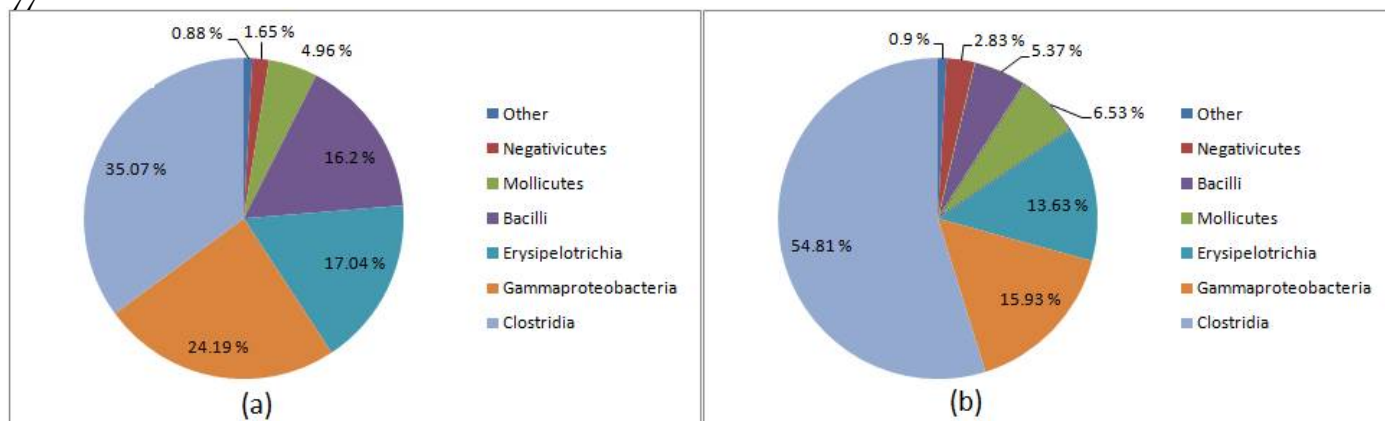

**Supplementary Figure S10.** Potential 6-phospho-beta-glucosidase producers in coronary artery disease patients (a) and control group (b).

80

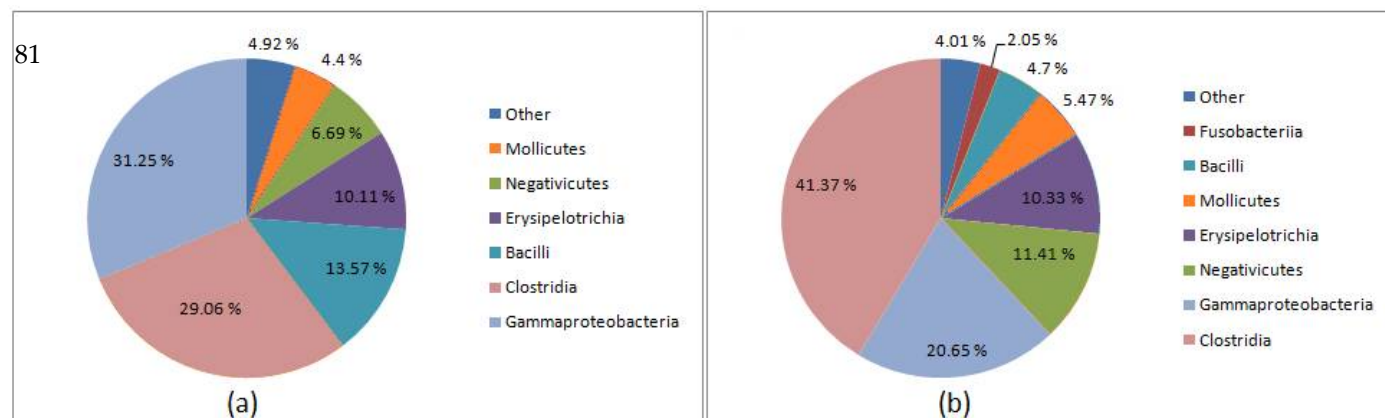

**Supplementary Figure S11.** Potential protein-N(pi)-phosphohistidine-sugar phosphotransferase producers in coronary artery disease patients (a) and control group (b).

**Supplementary Table S1.** The differences in relative abundance of bacterial phyla, classes, and orders in studied populations.

| Taxonomic unit            | Relative abundance in CAD group | Relative abundance in control group | p-value (adjusted for sex and age) |
|---------------------------|---------------------------------|-------------------------------------|------------------------------------|
| <b>Phyla</b>              |                                 |                                     |                                    |
| <i>Firmicutes</i>         | 52.034 (49.4657 - 54.6023)      | 52.6381 (50.631 - 54.6452)          | 0.745                              |
| <i>Actinobacteria</i>     | 3.3228 (2.5724 - 4.0732)        | 2.4287 (1.8701 - 2.9873)            | 0.06                               |
| <i>Cyanobacteria</i>      | 0.1242 (0.0571 - 0.1913)        | 0.2632 (0.1034 - 0.423)             | 0.111                              |
| <i>Spirochaetes</i>       | 0.0699 (-0.0293 - 0.1691)       | 0.0012 (-0.0012 - 0.0036)           | 0.176                              |
| <i>Patescibacteria</i>    | 0.022 (0.0056 - 0.0384)         | 0.0115 (0.0083 - 0.0147)            | 0.217                              |
| <i>Epsilonbacteraeota</i> | 0.0001 (-0.0001 - 0.0003)       | 0.0002 (0 - 0.0004)                 | 0.255                              |
| <i>Verrucomicrobia</i>    | 1.021 (0.0878 - 1.9542)         | 0.4623 (0.1554 - 0.7692)            | 0.264                              |
| <i>Synergistetes</i>      | 0.0153 (0.0022 - 0.0284)        | 0.0312 (0.0011 - 0.0613)            | 0.334                              |
| <i>Tenericutes</i>        | 1.4002 (1.0268 - 1.7736)        | 1.1882 (0.8237 - 1.5527)            | 0.422                              |
| <i>Fusobacteria</i>       | 0.1591 (0.01 - 0.3082)          | 0.2249 (-0.0596 - 0.5094)           | 0.684                              |
| <i>Lentisphaerae</i>      | 0.2813 (0.1928 - 0.3698)        | 0.2602 (0.1893 - 0.3311)            | 0.713                              |

|                                                                 |                             |                             |       |
|-----------------------------------------------------------------|-----------------------------|-----------------------------|-------|
| <i>Elusimicrobia</i>                                            | 0.036 (-0.0343 - 0.1063)    | 0.0244 (-0.0174 - 0.0662)   | 0.780 |
| <b>Classes</b>                                                  |                             |                             |       |
| <i>Actinobacteria_Actinobacteria</i>                            | 2.7165 (2.0288 - 3.4042)    | 1.9823 (1.4497 - 2.5149)    | 0.096 |
| <i>Actinobacteria_Coriobacteriia</i>                            | 0.6063 (0.4489 - 0.7637)    | 0.4464 (0.3298 - 0.563)     | 0.108 |
| <i>Cyanobacteria_Melainabacteria</i>                            | 0.1103 (0.0442 - 0.1764)    | 0.2414 (0.0832 - 0.3996)    | 0.129 |
| <i>Cyanobacteria_Oxyphotobacteria</i>                           | 0.0139 (0.0004 - 0.0274)    | 0.0219 (0.0003 - 0.0435)    | 0.533 |
| <i>Elusimicrobia_Elusimicrobia</i>                              | 0.036 (-0.0343 - 0.1063)    | 0.0244 (-0.0174 - 0.0662)   | 0.780 |
| <i>Epsilonbacteraeota_Campylobacteria</i>                       | 0.0001 (-0.0001 - 0.0003)   | 0.0002 (0 - 0.0004)         | 0.255 |
| <i>Firmicutes_Clostridia</i>                                    | 42.387 (39.7322 - 45.0418)  | 45.174 (42.9875 - 47.3605)  | 0.110 |
| <i>Firmicutes_Erysipelotrichia</i>                              | 1.4364 (0.919 - 1.9538)     | 1.0841 (0.7984 - 1.3698)    | 0.241 |
| <i>Firmicutes_Negativicutes</i>                                 | 4.0989 (3.2497 - 4.9481)    | 5.1593 (4.1275 - 6.1911)    | 0.117 |
| <i>Fusobacteria_Fusobacteriia</i>                               | 0.1591 (0.01 - 0.3082)      | 0.2249 (-0.0596 - 0.5094)   | 0.684 |
| <i>Lentisphaerae_Lentisphaeria</i>                              | 0.2813 (0.1928 - 0.3698)    | 0.2602 (0.1893 - 0.3311)    | 0.713 |
| <i>Patescibacteria_Saccharimonadia</i>                          | 0.022 (0.0056 - 0.0384)     | 0.0115 (0.0083 - 0.0147)    | 0.217 |
| <i>Proteobacteria_Alphaproteobacteria</i>                       | 0.5106 (0.3007 - 0.7205)    | 0.5749 (0.407 - 0.7428)     | 0.637 |
| <i>Proteobacteria_Deltaproteobacteria</i>                       | 0.8772 (0.6808 - 1.0736)    | 0.6892 (0.5591 - 0.8193)    | 0.116 |
| <i>Spirochaetes_Brachyspirae</i>                                | 0 (0 - 0)                   | 0.0012 (-0.0012 - 0.0036)   | 0.314 |
| <i>Spirochaetes_Spirochaetia</i>                                | 0.0699 (-0.0293 - 0.1691)   | 0 (0 - 0)                   | 0.168 |
| <i>Synergistetes_Synergistia</i>                                | 0.0153 (0.0022 - 0.0284)    | 0.0312 (0.0011 - 0.0613)    | 0.334 |
| <i>Tenericutes_Mollicutes</i>                                   | 1.4002 (1.0268 - 1.7736)    | 1.1882 (0.8237 - 1.5527)    | 0.422 |
| <i>Verrucomicrobia_Verrucomicrobiae</i>                         | 1.021 (0.0878 - 1.9542)     | 0.4623 (0.1554 - 0.7692)    | 0.264 |
| <b>Order</b>                                                    |                             |                             |       |
| <i>Actinobacteria_Actinobacteria_Bifidobacteriales</i>          | 2.6688 (1.9835 - 3.3541)    | 1.9585 (1.4261 - 2.4909)    | 0.107 |
| <i>Actinobacteria_Actinobacteria_Corynebacteriales</i>          | 0.0003 (0.0001 - 0.0005)    | 0.0003 (0.0001 - 0.0005)    | 0.911 |
| <i>Actinobacteria_Actinobacteria_Propionibacteriales</i>        | 0.0042 (0.0004 - 0.008)     | 0.0017 (0.0005 - 0.0029)    | 0.197 |
| <i>Actinobacteria_Coriobacteriia_Coriobacteriales</i>           | 0.6063 (0.4489 - 0.7637)    | 0.4464 (0.3298 - 0.563)     | 0.108 |
| <i>Bacteroidetes_Bacteroidia_Flavobacteriales</i>               | 0.062 (0.0378 - 0.0862)     | 0.0727 (0.043 - 0.1024)     | 0.578 |
| <i>Cyanobacteria_Melainabacteria_Gastranaerophilales</i>        | 0.1103 (0.0442 - 0.1764)    | 0.2414 (0.0832 - 0.3996)    | 0.129 |
| <i>Cyanobacteria_Oxyphotobacteria_Chloroplast</i>               | 0.0139 (0.0004 - 0.0274)    | 0.0219 (0.0003 - 0.0435)    | 0.533 |
| <i>Elusimicrobia_Elusimicrobia_Elusimicrobiales</i>             | 0.036 (-0.0343 - 0.1063)    | 0.0244 (-0.0174 - 0.0662)   | 0.780 |
| <i>Epsilonbacteraeota_Campylobacteria_Campylobacteriales</i>    | 0.0001 (-0.0001 - 0.0004)   | 0.0002 (0 - 0.0004)         | 0.255 |
| <i>Firmicutes_Bacilli_Bacillales</i>                            | 0.2207 (0.0492 - 0.3922)    | 0.0568 (0.0077 - 0.1059)    | 0.072 |
| <i>Firmicutes_Clostridia_Clostridiales</i>                      | 42.3791 (39.7249 - 45.0333) | 45.1646 (42.9787 - 47.3505) | 0.110 |
| <i>Firmicutes_Clostridia_DTU014</i>                             | 0.0079 (0.0051 - 0.0107)    | 0.0094 (0.0064 - 0.0124)    | 0.474 |
| <i>Firmicutes_Erysipelotrichia_Erysipelotrichales</i>           | 1.4364 (0.919 - 1.9538)     | 1.0841 (0.7984 - 1.3698)    | 0.241 |
| <i>Firmicutes_Negativicutes_Selenomonadales</i>                 | 4.0989 (3.2497 - 4.9481)    | 5.1593 (4.1275 - 6.1911)    | 0.117 |
| <i>Fusobacteria_Fusobacteriia_Fusobacteriales</i>               | 0.1591 (0.01 - 0.3082)      | 0.2249 (-0.0596 - 0.5094)   | 0.684 |
| <i>Lentisphaerae_Lentisphaeria_Victivallales</i>                | 0.2813 (0.1928 - 0.3698)    | 0.2602 (0.1893 - 0.3311)    | 0.713 |
| <i>Patescibacteria_Saccharimonadia_Saccharimonadales</i>        | 0.022 (0.0056 - 0.0384)     | 0.0115 (0.0083 - 0.0147)    | 0.217 |
| <i>Proteobacteria_Alphaproteobacteria_Rhizobiales</i>           | 0.0029 (-0.0001 - 0.0059)   | 0.0009 (-0.0001 - 0.0019)   | 0.219 |
| <i>Proteobacteria_Alphaproteobacteria_Rhodospirillales</i>      | 0.5074 (0.2975 - 0.7173)    | 0.5715 (0.4038 - 0.7392)    | 0.638 |
| <i>Proteobacteria_Alphaproteobacteria_Rickettsiales</i>         | 0.0004 (-0.0002 - 0.001)    | 0.0025 (-0.0011 - 0.0061)   | 0.234 |
| <i>Proteobacteria_Deltaproteobacteria_Desulfovibrionales</i>    | 0.8772 (0.6808 - 1.0736)    | 0.6892 (0.5591 - 0.8193)    | 0.116 |
| <i>Proteobacteria_Gammaproteobacteria_Aeromonadales</i>         | 0.1592 (0.0147 - 0.3037)    | 0.3233 (0.0669 - 0.5797)    | 0.268 |
| <i>Proteobacteria_Gammaproteobacteria_Alteromonadales</i>       | 0.0007 (-0.0003 - 0.0017)   | 0.0044 (-0.0039 - 0.0127)   | 0.38  |
| <i>Proteobacteria_Gammaproteobacteria_Betaproteobacteriales</i> | 0.2573 (0.144 - 0.3706)     | 0.3721 (0.2297 - 0.5145)    | 0.21  |
| <i>Proteobacteria_Gammaproteobacteria_Pasteurellales</i>        | 0.2048 (0.1018 - 0.3078)    | 0.1502 (0.0722 - 0.2282)    | 0.405 |
| <i>Proteobacteria_Gammaproteobacteria_Pseudomonadales</i>       | 0.0004 (0 - 0.0008)         | 0.0016 (0.0008 - 0.004)     | 0.303 |



|                                                            |                           |                           |       |
|------------------------------------------------------------|---------------------------|---------------------------|-------|
| <i>Proteobacteria_Gammaproteobacteria_Vibrionales</i>      | 0.0004 (0 - 0.0008)       | 0.0002 (0 - 0.0004)       | 0.119 |
| <i>Spirochaetes_Brachyspirae_Brachyspirales</i>            | 0 (0 - 0)                 | 0.0012 (-0.0012 - 0.0036) | 0.314 |
| <i>Spirochaetes_Spirochaetia_Spirochaetales</i>            | 0.0699 (-0.0293 - 0.1691) | 0 (0 - 0)                 | 0.168 |
| <i>Synergistetes_Synergistia_Synergistales</i>             | 0.0153 (0.0022 - 0.0284)  | 0.0312 (0.0011 - 0.0613)  | 0.334 |
| <i>Tenericutes_Mollicutes_Anaeroplasmatales</i>            | 0 (0 - 0)                 | 0.0002 (0 - 0.0004)       | 0.244 |
| <i>Tenericutes_Mollicutes_Izimaplasmatales</i>             | 0.1066 (0.0529 - 0.1603)  | 0.1957 (0.0636 - 0.3278)  | 0.214 |
| <i>Tenericutes_Mollicutes_Mollicutes.RF39</i>              | 1.2936 (0.9305 - 1.6567)  | 0.9923 (0.6832 - 1.3014)  | 0.212 |
| <i>Verrucomicrobia_Verrucomicrobiae_Opitutales</i>         | 0 (0 - 0)                 | 0.0087 (-0.0083 - 0.0257) | 0.312 |
| <i>Verrucomicrobia_Verrucomicrobiae_Verrucomicrobiales</i> | 1.021 (0.0878 - 1.9542)   | 0.4536 (0.1469 - 0.7603)  | 0.257 |

CAD – coronary artery disease group, CI - confidence interval. Mean values together with the 95% confidence intervals of the means are presented.

**Supplementary Table S2.** Statistically significant differences in the relative abundance of bacterial families and genera in studied populations.

| Taxonomic unit                                                                          | Relative abundance in CAD group | Relative abundance in control group | p (adjusted for sex and age) |
|-----------------------------------------------------------------------------------------|---------------------------------|-------------------------------------|------------------------------|
| <b>Families</b>                                                                         |                                 |                                     |                              |
| <i>Actinobacteria_Actinobacteria_Actinomycetales_Actinomycetaceae</i>                   | 0.0281 (0.0164 - 0.0398)        | 0.0135 (0.0095 - 0.0175)            | 0.021                        |
| <i>Actinobacteria_Actinobacteria_Micrococcales_Micrococcaceae</i>                       | 0.0152 (0.0108 - 0.0196)        | 0.0083 (0.0043 - 0.0123)            | 0.021                        |
| <i>Actinobacteria_Coriobacteriia_Coriobacteriales_Atopobiaceae</i>                      | 0.0499 (0.0269 - 0.0729)        | 0.0175 (0.0096 - 0.0254)            | 0.009                        |
| <i>Bacteroidetes_Bacteroidia_Bacteroidales_Barnesiellaceae</i>                          | 0.8394 (0.6557 - 1.0231)        | 1.2015 (0.9815 - 1.4215)            | 0.013                        |
| <i>Firmicutes_Bacilli_Lactobacillales_Lactobacillaceae</i>                              | 1.4705 (0.751 - 2.19)           | 0.1491 (0.0828 - 0.2154)            | <0.001                       |
| <i>Firmicutes_Bacilli_Lactobacillales_Streptococcaeae</i>                               | 2.2671 (1.4527 - 3.0815)        | 0.9256 (0.5338 - 1.3174)            | 0.004                        |
| <i>Proteobacteria_Gammaproteobacteria_Enterobacteriales_Enterobacteriaceae</i>          | 5.4589 (3.1754 - 7.7424)        | 2.5555 (1.4063 - 3.7047)            | 0.026                        |
| <b>Genera</b>                                                                           |                                 |                                     |                              |
| <i>Actinobacteria_Actinobacteria_Actinomycetales_Actinomycetaceae_Actinomyces</i>       | 0.028 (0.0163 - 0.0397)         | 0.0133 (0.0093 - 0.0173)            | 0.020                        |
| <i>Actinobacteria_Actinobacteria_Bifidobacteriales_Bifidobacteriaceae_Alloscardovia</i> | 0.0045 (0.0013 - 0.0077)        | 0.0007 (0.0003 - 0.0011)            | 0.025                        |
| <i>Actinobacteria_Actinobacteria_Micrococcales_Micrococcaceae_Rothia</i>                | 0.0152 (0.0108 - 0.0196)        | 0.0083 (0.0043 - 0.0123)            | 0.021                        |
| <i>Actinobacteria_Coriobacteriia_Coriobacteriales_Atopobiaceae_Atopobium</i>            | 0.006 (0.0034 - 0.0086)         | 0.0021 (0.0013 - 0.0029)            | 0.003                        |
| <i>Bacteroidetes_Bacteroidia_Bacteroidales_Barnesiellaceae_Barnesiella</i>              | 0.7082 (0.5405 - 0.8759)        | 1.035 (0.822 - 1.248)               | 0.017                        |
| <i>Bacteroidetes_Bacteroidia_Bacteroidales_Barnesiellaceae_Copro bacter</i>             | 0.0766 (0.0554 - 0.0978)        | 0.1114 (0.0849 - 0.1379)            | 0.044                        |
| <i>Bacteroidetes_Bacteroidia_Bacteroidales_Prevotellaceae_Paraprevotella</i>            | 0.559 (0.4048 - 0.7132)         | 0.9423 (0.6885 - 1.1961)            | 0.011                        |
| <i>Firmicutes_Bacilli_Lactobacillales_Carnobacteriaceae_Carnobacterium</i>              | 0.0003 (0.0001 - 0.0005)        | (0 - 0)                             | 0.049                        |
| <i>Firmicutes_Bacilli_Lactobacillales_Lactobacillaceae_Lactobacillus</i>                | 1.4644 (0.7449 - 2.1839)        | 0.1461 (0.0806 - 0.2116)            | <0.001                       |
| <i>Firmicutes_Bacilli_Lactobacillales_Streptococcaeae_Streptococcus</i>                 | 2.2143 (1.4065 - 3.0221)        | 0.9119 (0.5201 - 1.3037)            | 0.005                        |
| <i>Firmicutes_Clostridia_Clostridiales_Clostridiales.vadinBB60.group_Ambiguous</i>      | 0.1537 (0.089 - 0.2184)         | 0.3323 (0.1832 - 0.4814)            | 0.029                        |



|                                                                                          |                          |                          |        |
|------------------------------------------------------------------------------------------|--------------------------|--------------------------|--------|
| <i>Firmicutes_Clostridia_Clostridiales_Family.XI_Peptoniphilus</i>                       | 0.003 (0.0008 - 0.0052)  | 0.0006 (0 - 0.0012)      | 0.036  |
| <i>Firmicutes_Clostridia_Clostridiales_Family.XII_I_Eubacterium.nodatum.group</i>        | 0.0059 (0.0033 - 0.0085) | 0.0108 (0.0066 - 0.015)  | 0.046  |
| <i>Firmicutes_Clostridia_Clostridiales_Lachnospiraceae_Coproccoccus.3</i>                | 0.0007 (0.0001 - 0.0013) | 0.002 (0.0014 - 0.0026)  | 0.013  |
| <i>Firmicutes_Clostridia_Clostridiales_Lachnospiraceae_Eubacterium.hallii.group</i>      | 0.0453 (0.0217 - 0.0689) | 0.019 (0.0075 - 0.0305)  | 0.049  |
| <i>Firmicutes_Clostridia_Clostridiales_Lachnospiraceae_GCA.900066755</i>                 | 0.001 (0.0006 - 0.0014)  | 0.0025 (0.0017 - 0.0033) | 0.002  |
| <i>Firmicutes_Clostridia_Clostridiales_Lachnospiraceae_Lachnospiraceae.NK4A136.group</i> | 0.525 (0.365 - 0.685)    | 0.9508 (0.7558 - 1.1458) | <0.001 |
| <i>Firmicutes_Clostridia_Clostridiales_Lachnospiraceae_Lachnospiraceae.UCG.006</i>       | 0.1738 (0.1213 - 0.2263) | 0.2881 (0.234 - 0.3422)  | 0.003  |
| <i>Firmicutes_Clostridia_Clostridiales_Lachnospiraceae_Lachnospiraceae.UCG.008</i>       | 0.4953 (0.4086 - 0.582)  | 0.7278 (0.6021 - 0.8535) | 0.003  |
| <i>Firmicutes_Clostridia_Clostridiales_Lachnospiraceae_Lachnospiraceae.UCG.010</i>       | 0.1136 (0.077 - 0.1502)  | 0.2182 (0.1691 - 0.2673) | <0.001 |
| <i>Firmicutes_Clostridia_Clostridiales_Lachnospiraceae_Roseburia</i>                     | 2.7577 (2.3439 - 3.1715) | 3.3971 (2.9286 - 3.8656) | 0.043  |
| <i>Firmicutes_Clostridia_Clostridiales_Lachnospiraceae_Tyzzereella.3</i>                 | 0.1266 (0.064 - 0.1892)  | 0.3635 (0.2146 - 0.5124) | 0.004  |
| <i>Firmicutes_Clostridia_Clostridiales_Lachnospiraceae_Uncultured</i>                    | 0.5817 (0.4714 - 0.692)  | 0.8661 (0.7578 - 0.9744) | <0.001 |
| <i>Firmicutes_Clostridia_Clostridiales_Peptococcaceae_Uncultured</i>                     | 0.0182 (0.0136 - 0.0228) | 0.0377 (0.0264 - 0.049)  | 0.002  |
| <i>Firmicutes_Clostridia_Clostridiales_Peptostreptococcaceae_Peptostreptococcus</i>      | 0.0003 (0.0001 - 0.0005) | (0 - 0)                  | 0.049  |
| <i>Firmicutes_Clostridia_Clostridiales_Ruminococcaceae_Ambiguous</i>                     | 0.0161 (0.0098 - 0.0224) | 0.028 (0.0217 - 0.0343)  | 0.01   |
| <i>Firmicutes_Clostridia_Clostridiales_Ruminococcaceae_Anaerofilum</i>                   | 0.0039 (0.0027 - 0.0051) | 0.0074 (0.0058 - 0.009)  | <0.001 |
| <i>Firmicutes_Clostridia_Clostridiales_Ruminococcaceae_Anaerotruncus</i>                 | 0.01 (0.0062 - 0.0138)   | 0.0168 (0.0115 - 0.0221) | 0.038  |
| <i>Firmicutes_Clostridia_Clostridiales_Ruminococcaceae_Butyricoccus</i>                  | 0.2359 (0.191 - 0.2808)  | 0.3172 (0.2568 - 0.3776) | 0.033  |
| <i>Firmicutes_Clostridia_Clostridiales_Ruminococcaceae_DTU089</i>                        | 0.0101 (0.0061 - 0.0141) | 0.0203 (0.0152 - 0.0254) | 0.002  |
| <i>Firmicutes_Clostridia_Clostridiales_Ruminococcaceae_Faecalibacterium</i>              | 7.1013 (6.2404 - 7.9622) | 8.8906 (8.1166 - 9.6646) | 0.002  |
| <i>Firmicutes_Clostridia_Clostridiales_Ruminococcaceae_Flavonifractor</i>                | 0.0521 (0.0325 - 0.0717) | 0.0855 (0.0608 - 0.1103) | 0.036  |
| <i>Firmicutes_Clostridia_Clostridiales_Ruminococcaceae_Harryflintia</i>                  | 0.0013 (0.0009 - 0.0017) | 0.0028 (0.0014 - 0.0042) | 0.039  |
| <i>Firmicutes_Clostridia_Clostridiales_Ruminococcaceae_Intestinimonas</i>                | 0.0186 (0.0121 - 0.0251) | 0.0356 (0.0198 - 0.0514) | 0.049  |
| <i>Firmicutes_Clostridia_Clostridiales_Ruminococcaceae_Oscillibacter</i>                 | 0.1351 (0.0981 - 0.1721) | 0.2792 (0.1978 - 0.3606) | 0.001  |
| <i>Firmicutes_Clostridia_Clostridiales_Ruminococcaceae_Phocaea</i>                       | 0.004 (0.0024 - 0.0056)  | 0.0089 (0.0065 - 0.0113) | <0.001 |
| <i>Firmicutes_Clostridia_Clostridiales_Ruminococcaceae_Ruminiclostridium</i>             | 0.0116 (0.008 - 0.0152)  | 0.0201 (0.0148 - 0.0254) | 0.009  |
| <i>Firmicutes_Clostridia_Clostridiales_Ruminococcaceae_Ruminiclostridium.6</i>           | 0.2491 (0.1648 - 0.3334) | 0.5274 (0.404 - 0.6508)  | <0.001 |
| <i>Firmicutes_Clostridia_Clostridiales_Ruminococcaceae_Ruminococcaceae.UCG.009</i>       | 0.0153 (0.0109 - 0.0197) | 0.0243 (0.0186 - 0.03)   | 0.013  |
| <i>Firmicutes_Clostridia_Clostridiales_Ruminococcaceae_Ruminococcus.1</i>                | 0.8531 (0.7092 - 0.997)  | 1.2645 (1.0556 - 1.4734) | 0.001  |

|                                                                                            |                          |                          |        |
|--------------------------------------------------------------------------------------------|--------------------------|--------------------------|--------|
| <i>Firmicutes_Clostridia_Clostridiales_Ruminococaceae_Uncultured</i>                       | 0.7571 (0.6272 - 0.887)  | 1.0365 (0.887 - 1.186)   | 0.005  |
| <i>Firmicutes_Erysipelotrichia_Erysipelotrichales_Erysipelotrichaceae_Holdemania</i>       | 0.0071 (0.0051 - 0.0091) | 0.0152 (0.011 - 0.0194)  | <0.001 |
| <i>Proteobacteria_Alphaproteobacteria_Rhodospirillales_Uncultured_Uncultured.bacterium</i> | 0.0109 (0.0004 - 0.0214) | 0.0715 (0.0151 - 0.1279) | 0.036  |

CAD – coronary artery disease group, CI - confidence interval. Mean values together with the 95% confidence intervals of the means are presented.

**Supplementary Table S3.** The influence of Firmicutes/Bacteroidetes ratio on targeted metabolomics (Biocrates) and biochemical test adjusted for age, sex, CAD status, statins treatment (and) LDL cholesterol concentration.

| Metabolite, $\mu\text{mol/L}$ | Group with F/B ratio $\leq 1.54$<br>(n = 167) | Group with F/B ratio $> 1.54$<br>(n = 167)   | P value<br>(* adjusted for age, sex, CAD status, LDL cholesterol concentration, statins treatment<br>** adjusted for age, sex, CAD status, statins treatment) |
|-------------------------------|-----------------------------------------------|----------------------------------------------|---------------------------------------------------------------------------------------------------------------------------------------------------------------|
| Acylcarnitines C0             | 6228.025<br>(95% CI 5865.0888 - 6590.9612)    | 6442.4714<br>(95% CI 6050.7082 - 6834.2346 ) | 0.394195                                                                                                                                                      |
| Acylcarnitines C10            | 91.9532<br>(95% CI 84.6052 - 99.3012)         | 104.1058<br>(95% CI 80.2349 - 127.9767)      | 0.310319                                                                                                                                                      |
| Acylcarnitines C12            | 45.0194<br>(95% CI 41.1505 - 48.8883)         | 58.4254<br>(95% CI 30.2225 - 86.6283)        | 0.333143                                                                                                                                                      |
| Acylcarnitines C14.1          | 56.8537<br>(95% CI 47.2186 - 66.4888)         | 52.9099<br>(95% CI 41.598 - 64.2218)         | 0.591831                                                                                                                                                      |
| Acylcarnitines C14.1.OH       | 16.0353<br>(95% CI 0.3343 - 31.7363)          | 78.7392<br>(95% CI -16.6523 - 174.1307)      | 0.201986                                                                                                                                                      |
| Acylcarnitines C14.2          | 32.3733<br>(95% CI 7.9631 - 56.7835)          | 53.3412<br>(95% CI 0.2622 - 106.4202)        | 0.538153                                                                                                                                                      |
| Acylcarnitines C16            | 62.5412<br>(95% CI 53.3689 - 71.7136)         | 95.8507<br>(95% CI 38.7063 - 152.9951)       | 0.232551                                                                                                                                                      |
| Acylcarnitines C16.1          | 23.6724<br>(95% CI 17.4194 - 29.9254)         | 38.0786<br>(95% CI 10.002 - 66.1552)         | 0.317191                                                                                                                                                      |
| Acylcarnitines C18            | 29.8955<br>(95% CI 21.5163 - 38.2747)         | 110.0393<br>(95% CI -49.4941 - 269.5727)     | 0.288166                                                                                                                                                      |
| Acylcarnitines C18.1          | 76.9662<br>(95% CI 69.0298 - 84.9026)         | 110.307<br>(95% CI 33.2622 - 187.3518)       | 0.36986                                                                                                                                                       |
| Acylcarnitines C18.2          | 31.2203<br>(95% CI 17.3391 - 45.1015)         | 71.8563<br>(95% CI -20.2222 - 163.9348)      | 0.369156                                                                                                                                                      |
| Acylcarnitines C2             | 1660.6125<br>(95% CI 1530.1463 - 1791.0787)   | 1532.2535<br>(95% CI 1404.6255 - 1659.8815)  | 0.168835                                                                                                                                                      |
| Acylcarnitines C3             | 84.4912<br>(95% CI 77.5442 - 91.4382)         | 82.3549<br>(95% CI 76.6111 - 88.0987)        | 0.658476                                                                                                                                                      |
| Acylcarnitines C3.1           | 8.1423<br>(95% CI -1.8246 - 18.1092)          | 20.2436<br>(95% CI -9.0578 - 49.545)         | 0.452543                                                                                                                                                      |
| Acylcarnitines C4             | 52.15<br>(95% CI 47.3346 - 56.9654 )          | 56.2366<br>(95% CI 47.3424 - 65.1308)        | 0.408403                                                                                                                                                      |
| Acylcarnitines C4.1           | 14.1714<br>(95% CI 6.8735 - 21.4693 )         | 5.0609<br>(95% CI 1.5167 - 8.6051)           | 0.053336                                                                                                                                                      |

|                               |                                                   |                                                     |          |
|-------------------------------|---------------------------------------------------|-----------------------------------------------------|----------|
| Acylcarnitines C5             | 42.7348<br>(95% CI 38.9288 - 46.5408 )            | 44.618<br>(95% CI 41.4494 - 47.7866)                | 0.401277 |
| Acylcarnitines C5.1.DC        | 8.948<br>(95% CI 4.9823 - 12.9137)                | 8.1004<br>(95% CI 5.9949 - 10.2059)                 | 0.751624 |
| Acylcarnitines C5.DC.C6.OH.   | 14.5848<br>(95% CI 8.3933 - 20.7763)              | 17.1242<br>(95% CI 8.7282 - 25.5202)                | 0.643354 |
| Acylcarnitines C5.M.DC        | 15.48<br>(95% CI 11.9433 - 19.0167)               | 16.3322<br>(95% CI 11.2691 - 21.3953)               | 0.731803 |
| Acylcarnitines C5.OH.C3.DC.M. | 13.293<br>(95% CI 10.089 - 16.497)                | 13.26<br>(95% CI 10.9398 - 15.5802)                 | 0.932428 |
| Acylcarnitines C6.1           | 17.0942<br>(95% CI 1.4207 - 32.7677)              | 15.2214<br>(95% CI -3.2898 - 33.7326)               | 0.885145 |
| Acylcarnitines C6.C4.1.DC.    | 30.4615<br>(95% CI 26.51 - 34.413)                | 45.3963<br>(95% CI 14.5008 - 76.2918)               | 0.410314 |
| Acylcarnitines C7.DC          | 26.6438<br>(95% CI 18.7446 - 34.543)              | 40.4308<br>(95% CI 5.2973 - 75.5643)                | 0.425139 |
| Acylcarnitines C8             | 69.7018<br>(95% CI 64.8356 - 74.568)              | 77.6435<br>(95% CI 68.3977 - 86.8893)               | 0.119552 |
| Acylcarnitines C9             | 36.6891<br>(95% CI -9.3659 - 82.7441)             | 122.4595<br>(95% CI -71.3738 - 316.2928)            | 0.546283 |
| Aminoacids Ala                | 38552.325<br>(95% CI 36194.2236 - 40910.4264)     | 813246.2394<br>(95% CI -723091.6358 - 2349584.1146) | 0.294469 |
| Aminoacids Arg                | 19561.275<br>(95% CI 18757.6407 - 20364.9093)     | 19592.9718 (95% CI 18686.6783 - 20499.2653)         | 0.951491 |
| Aminoacids Asn                | 6243.8125<br>(95% CI 5950.2195 - 6537.4055)       | 18882.8873 (95% CI -6332.742 - 44098.5166)          | 0.2973   |
| Aminoacids Asp                | 3483.7051<br>(95% CI 3199.2755 - 3768.1347)       | 32823.5942 (95% CI -25708.5615 - 91355.7499)        | 0.296448 |
| Aminoacids Cit                | 5754.8375<br>(95% CI 5399.2632 - 6110.4118)       | 64159.0563 (95% CI -51228.1535 - 179546.2661)       | 0.29263  |
| Aminoacids Gln                | 107208.0875<br>(95% CI 103710.8375 - 110705.3375) | 109585.3521 (95% CI 105921.7866 - 113248.9176)      | 0.342918 |
| Aminoacids Glu                | 11749.5584<br>(95% CI 10619.8854 - 12879.2314)    | 200781.3971 (95% CI -174099.778 - 575662.5722)      | 0.293221 |
| Aminoacids Gly                | 20471.7375<br>(95% CI 19020.568 - 21922.907)      | 18799.3099 (95% CI 17609.0424 - 19989.5774)         | 0.086364 |
| Aminoacids His                | 14484.2125<br>(95% CI 14016.6876 - 14951.7374)    | 14794.2113 (95% CI 14296.2985 - 15292.1241)         | 0.351484 |
| Aminoacids Ile                | 11749.5625<br>(95% CI 11028.1554 - 12470.9696)    | 11978.1549 (95% CI 11294.5753 - 12661.7345)         | 0.598171 |
| Aminoacids Leu                | 24346.975<br>(95% CI 23061.681 - 25632.269)       | 24764.5634 (95% CI 23607.3233 - 25921.8035)         | 0.580081 |
| Aminoacids Lys                | 36647.325 (95% CI 35187.3209 - 38107.3291)        | 38373.8451 (95% CI 36626.601 - 40121.0892)          | 0.118937 |
| Aminoacids Met                | 3705.2857<br>(95% CI 3535.2661 - 3875.3053)       | 3833.4923 (95% CI 3641.3188 - 4025.6658)            | 0.29102  |
| Aminoacids Orn                | 12454.225<br>(95% CI 11656.6281 - 13251.8219)     | 12974.3803 (95% CI 12052.7471 - 13896.0135 )        | 0.304364 |
| Aminoacids Phe                | 12947.5625<br>(95% CI 12362.4412 - 13532.6838)    | 12773.8028 (95% CI 12231.2636 - 13316.342)          | 0.692633 |
| Aminoacids Pro                | 20963.35<br>(95% CI 19672.5959 - 22254.1041)      | 22298.169 (95% CI 20728.8933 - 23867.4447)          | 0.154627 |
| Aminoacids Ser                | 15089.95<br>(95% CI 14425.9148 - 15753.9852)      | 14558.4507 (95% CI 13963.228 - 15153.6733)          | 0.245737 |
| Aminoacids Thr                | 14448.2<br>(95% CI 13723.6285 - 15172.7715)       | 181938.4507 (95% CI -149073.5731 - 512950.4745)     | 0.292781 |
| Aminoacids Trp                | 13913.625                                         | 14120.7606 (95% CI 13627.7602 - 14573.7610)         | 0.501583 |

|                                     |                                                |                                                   |          |
|-------------------------------------|------------------------------------------------|---------------------------------------------------|----------|
|                                     | (95% CI 13432.9182 - 14394.3318)               | 14613.761)                                        |          |
| Aminoacids Tyr                      | 14134.9625<br>(95% CI 13441.3327 - 14828.5923) | 14351.3803 (95% CI 13635.0555 - 15067.7051)       | 0.59819  |
| Aminoacids Val                      | 32503.6875<br>(95% CI 30915.7758 - 34091.5992) | 33617.507 (95% CI 32035.7369 - 35199.2771)        | 0.297339 |
| Biogenic.Amines Ac.Orn              | 50.9478<br>(95% CI 50.6051 - 51.2905)          | 50.7077<br>(95% CI 50.4968 - 50.9186)             | 0.565192 |
| Biogenic.Amines ADMA                | 109.414<br>(95% CI 103.2287 - 115.5993)        | 3453.5489<br>(95% CI -3168.2683 - 10075.3661)     | 0.307849 |
| Biogenic.Amines alpha.AAA           | 224.2831<br>(95% CI 205.3335 - 243.2327)       | 218.0236<br>(95% CI 198.7948 - 237.2524)          | 0.6967   |
| Biogenic.Amines c4.OH.Pro           | 8.0352<br>(95% CI 7.8356 - 8.2348)             | 7.9012<br>(95% CI 7.8075 - 7.9949)                | 0.391707 |
| Biogenic.Amines Carnosine           | 34.0396<br>(95% CI 28.0097 - 40.0695)          | 38.5341<br>(95% CI 32.388 - 44.6802)              | 0.332668 |
| Biogenic.Amines Creatinine          | 9456.5844<br>(95% CI 9014.3924 - 9898.7764)    | 112214.4925<br>(95% CI -91269.5955 - 315698.5805) | 0.288438 |
| Biogenic.Amines DOPA                | 51.3125<br>(95% CI 50.4732 - 52.1518)          | 90.0511<br>(95% CI 12.8719 - 167.2303)            | 0.323331 |
| Biogenic.Amines Dopamine            | 67.3792<br>(95% CI 59.4067 - 75.3517)          | 72.5978<br>(95% CI 64.3976 - 80.798)              | 0.401899 |
| Biogenic.Amines Histamine           | 48.1688<br>(95% CI 40.8147 - 55.5229)          | 53.7341<br>(95% CI 46.1994 - 61.2688)             | 0.326598 |
| Biogenic.Amines Kynurenine          | 658.0274<br>(95% CI 625.0558 - 690.999)        | 670.0156<br>(95% CI 634.479 - 705.5522)           | 0.564147 |
| Biogenic.Amines Met.SO              | 90.6043<br>(95% CI 78.6099 - 102.5987)         | 93.4455<br>(95% CI 82.1894 - 104.7016)            | 0.599824 |
| Biogenic.Amines Nitro.Tyr           | 53.8042<br>(95% CI 46.2891 - 61.3193)          | 59.8364<br>(95% CI 52.2025 - 67.4703)             | 0.291585 |
| Biogenic.Amines Putrescine          | 16.4222<br>(95% CI 15.1851 - 17.6593)          | 151.9271<br>(95% CI -115.8148 - 419.669)          | 0.287407 |
| Biogenic.Amines Sarcosine           | 157.7667<br>(95% CI 141.4563 - 174.0771)       | 2786.28<br>(95% CI -2437.9506 - 8010.5106)        | 0.303657 |
| Biogenic.Amines SDMA                | 124.9559<br>(95% CI 117.3937 - 132.5181)       | 3881.7786<br>(95% CI -3555.9774 - 11319.5346)     | 0.278513 |
| Biogenic.Amines Serotonin           | 108.2559<br>(95% CI 91.9847 - 124.5271)        | 1733.7544<br>(95% CI -1505.4068 - 4972.9156)      | 0.282177 |
| Biogenic.Amines Spermidine          | 34.1208<br>(95% CI 31.7143 - 36.5273)          | 58.2422<br>(95% CI 14.8909 - 101.5935)            | 0.270366 |
| Biogenic.Amines Spermine            | 32.1<br>(95% CI 28.0818 - 36.1182)             | 39.4542<br>(95% CI 24.5973 - 54.3111)             | 0.47012  |
| Biogenic.Amines t4.OH.Pro           | 1655.9125<br>(95% CI 1458.0555 - 1853.7695)    | 1704.3521<br>(95% CI 1513.3647 - 1895.3395)       | 0.713953 |
| Biogenic.Amines Taurine             | 16431.5375<br>(95% CI 15653.9588 - 17209.1162) | 18388.9296<br>(95% CI 14519.3124 - 22258.5468)    | 0.298395 |
| Glycerophospholipids lysoPC.a.C14.0 | 2358.4625<br>(95% CI 2040.1591 - 2676.7659)    | 2334.9577<br>(95% CI 2066.2628 - 2603.6526)       | 0.91158  |
| Glycerophospholipids lysoPC.a.C16.0 | 40229.875<br>(95% CI 37904.5612 - 42555.1888)  | 38141.7465<br>(95% CI 35774.3484 - 40509.1446)    | 0.220651 |
| Glycerophospholipids lysoPC.a.C16.1 | 1138.8375<br>(95% CI 1045.7929 - 1231.8821)    | 1142<br>(95% CI 924.8712 - 1359.1288)             | 0.970598 |
| Glycerophospholipids lysoPC.a.C17.0 | 688.675<br>(95% CI 571.0064 - 806.3436)        | 778.7465<br>(95% CI 535.399 - 1022.094)           | 0.499013 |
| Glycerophospholipids lysoPC.a.C18.0 | 13684.75<br>(95% CI 12887.7295 - 14481.7705)   | 13559.1549<br>(95% CI 12094.8194 - 15023.4904)    | 0.88543  |
| Glycerophospholipids lysoPC.a.C18.1 | 9342.2375<br>(95% CI 8662.4885 - 10021.9865)   | 8919.6197 (95% CI 8323.4217 - 9515.8177)          | 0.366214 |

|                      |                                    |                                    |          |
|----------------------|------------------------------------|------------------------------------|----------|
| Glycerophospholipids | 11223.5625                         | 11336.8732                         |          |
| lysoPC.a.C18.2       | (95% CI 10340.8199 - 12106.3051)   | (95% CI 10414.7159 - 12259.0305 )  | 0.872987 |
| Glycerophospholipids | 936.8228                           | 950.9296                           |          |
| lysoPC.a.C20.3       | (95% CI 873.0539 - 1000.5917)      | (95% CI 863.1235 - 1038.7357)      | 0.790362 |
| Glycerophospholipids | 3228.15                            | 2971.0845                          |          |
| lysoPC.a.C20.4       | (95% CI 2865.5894 - 3590.7106)     | (95% CI 2708.6008 - 3233.5682)     | 0.273605 |
| Glycerophospholipids | 1297.4                             | 9282                               |          |
| lysoPC.a.C24.0       | (95% CI -933.8036 - 3528.6036)     | (95% CI -7620.1207 - 26184.1207)   | 0.171411 |
| Glycerophospholipids | 269.9651                           | 666.8808                           |          |
| lysoPC.a.C26.1       | (95% CI 18.7395 - 521.1907)        | (95% CI -378.1937 - 1711.9553)     | 0.380124 |
| Glycerophospholipids | 459.8121                           | 475.3304                           |          |
| lysoPC.a.C28.1       | (95% CI -106.597 - 1026.2212)      | (95% CI -172.8129 - 1123.4737)     | 0.955654 |
| Glycerophospholipids | 1802.725                           | 1811.9014                          |          |
| PC.aa.C28.1          | (95% CI 1693.8054 - 1911.6446)     | (95% CI 1677.0125 - 1946.7903)     | 0.92576  |
| Glycerophospholipids | 2564.1125                          | 2573.9577                          |          |
| PC.aa.C30.0          | (95% CI 2361.748 - 2766.477)       | (95% CI 2346.7416 - 2801.1738)     | 0.970562 |
| Glycerophospholipids | 10164.8                            | 9771.2113                          |          |
| PC.aa.C32.0          | (95% CI 9466.136 - 10863.464)      | (95% CI 9084.5633 - 10457.8593)    | 0.416248 |
| Glycerophospholipids | 10617.8375                         | 9894.9155                          |          |
| PC.aa.C32.1          | (95% CI 9270.8748 - 11964.8002)    | (95% CI 8754.8834 - 11034.9476)    | 0.421334 |
| Glycerophospholipids | 2545.1125                          | 2368.3239                          |          |
| PC.aa.C32.2          | (95% CI 2247.2752 - 2842.9498)     | (95% CI 2122.4897 - 2614.1581)     | 0.345754 |
| Glycerophospholipids | 260.3975                           | 257.5493                           |          |
| PC.aa.C32.3          | (95% CI 243.383 - 277.412)         | (95% CI 237.0508 - 278.0478)       | 0.810979 |
| Glycerophospholipids | 170534.225                         | 158411.831                         |          |
| PC.aa.C34.1          | (95% CI 158650.3246 - 182418.1254) | (95% CI 147075.2959 - 169748.3661) | 0.148277 |
| Glycerophospholipids | 254021.725                         | 236396.1408                        |          |
| PC.aa.C34.2          | (95% CI 238074.3688 - 269969.0812) | (95% CI 218825.0343 - 253967.2473) | 0.128968 |
| Glycerophospholipids | 10241.6375                         | 9698.507                           |          |
| PC.aa.C34.3          | (95% CI 9478.2352 - 11005.0398)    | (95% CI 8783.0057 - 10614.0083)    | 0.359569 |
| Glycerophospholipids | 1063.0125                          | 983.3803                           |          |
| PC.aa.C34.4          | (95% CI 970.0927 - 1155.9323)      | (95% CI 904.5878 - 1062.1728)      | 0.192577 |
| Glycerophospholipids | 2406.5395                          | 2461.6812                          |          |
| PC.aa.C36.0          | (95% CI 2039.7807 - 2773.2983)     | (95% CI 1625.1668 - 3298.1956)     | 0.929583 |
| Glycerophospholipids | 42879.1125                         | 42165.6479                         |          |
| PC.aa.C36.1          | (95% CI 40399.2156 - 45359.0094)   | (95% CI 39188.9585 - 45142.3373)   | 0.706492 |
| Glycerophospholipids | 185946.1375                        | 179501.8286                        |          |
| PC.aa.C36.2          | (95% CI 174650.7527 - 197241.5223) | (95% CI 167021.754 - 191981.9032)  | 0.425394 |
| Glycerophospholipids | 90408.075                          | 87346.9437                         |          |
| PC.aa.C36.3          | (95% CI 85616.6439 - 95199.5061)   | (95% CI 81957.7278 - 92736.1596)   | 0.386101 |
| Glycerophospholipids | 25307.925                          | 22105.6714                         |          |
| PC.aa.C36.5          | (95% CI 22099.7639 - 28516.0861)   | (95% CI 19291.0737 - 24920.2691)   | 0.147414 |
| Glycerophospholipids | 797.4875                           | 701.7183                           |          |
| PC.aa.C36.6          | (95% CI 719.2359 - 875.7391)       | (95% CI 630.2294 - 773.2072)       | 0.076595 |
| Glycerophospholipids | 2732.0625                          | 2572.3239                          |          |
| PC.aa.C38.0          | (95% CI 2564.4804 - 2899.6446)     | (95% CI 2382.8145 - 2761.8333)     | 0.206856 |
| Glycerophospholipids | 1145.7375                          | 1201.5882                          |          |
| PC.aa.C38.1          | (95% CI 1043.2509 - 1248.2241)     | (95% CI 889.3812 - 1513.7952)      | 0.722978 |
| Glycerophospholipids | 38180.6125                         | 37374.8571                         |          |
| PC.aa.C38.3          | (95% CI 35895.9622 - 40465.2628)   | (95% CI 34942.281 - 39807.4332)    | 0.628198 |
| Glycerophospholipids | 93945.15                           | 86085.5143                         |          |
| PC.aa.C38.4          | (95% CI 87855.9105 - 100034.3895)  | (95% CI 80338.0398 - 91832.9888)   | 0.068258 |
| Glycerophospholipids | 401.0556                           | 549.8                              |          |
| PC.aa.C40.1          | (95% CI 333.5327 - 468.5786)       | (95% CI 241.6704 - 857.9296)       | 0.260205 |
| Glycerophospholipids | 271.61                             | 247.6394                           |          |
| PC.aa.C40.2          | (95% CI 244.7426 - 298.4774)       | (95% CI 207.4832 - 287.7956)       | 0.31349  |
| Glycerophospholipids | 572.6125                           | 522.8592                           | 0.353426 |

|                      |                                  |                                  |          |
|----------------------|----------------------------------|----------------------------------|----------|
| PC.aa.C40.3          | (95% CI 495.2151 - 650.0099)     | (95% CI 449.2072 - 596.5112)     |          |
| Glycerophospholipids | 2242.1875                        | 2206.9577                        |          |
| PC.aa.C40.4          | (95% CI 2076.1279 - 2408.2471)   | (95% CI 2048.2704 - 2365.645)    | 0.757802 |
| Glycerophospholipids | 8391.5875                        | 7985.6479                        |          |
| PC.aa.C40.5          | (95% CI 7824.5597 - 8958.6153)   | (95% CI 7337.11 - 8634.1858)     | 0.353549 |
| Glycerophospholipids | 474.1625                         | 500.9296                         |          |
| PC.aa.C42.0          | (95% CI 439.7747 - 508.5503)     | (95% CI 452.8699 - 548.9893)     | 0.366453 |
| Glycerophospholipids | 228.8725                         | 221.6761                         |          |
| PC.aa.C42.1          | (95% CI 185.8176 - 271.9274)     | (95% CI 194.1808 - 249.1714)     | 0.779071 |
| Glycerophospholipids | 196.2785                         | 194.2225                         |          |
| PC.aa.C42.2          | (95% CI 181.4416 - 211.1154)     | (95% CI 136.1693 - 252.2757)     | 0.932799 |
| Glycerophospholipids | 136.6225                         | 135.3114                         |          |
| PC.aa.C42.4          | (95% CI 127.9267 - 145.3183 )    | (95% CI 114.9831 - 155.6397)     | 0.892175 |
| Glycerophospholipids | 337.3875                         | 321                              |          |
| PC.aa.C42.5          | (95% CI 308.2558 - 366.5192)     | (95% CI 281.776 - 360.224)       | 0.493012 |
| Glycerophospholipids | 445.275                          | 403.8592                         |          |
| PC.aa.C42.6          | (95% CI 338.5389 - 552.0111)     | (95% CI 335.1419 - 472.5765)     | 0.526649 |
| Glycerophospholipids | 64.8688                          | 67.6423                          |          |
| PC.ae.C30.2          | (95% CI 53.803 - 75.9346)        | (95% CI 53.7225 - 81.5621)       | 0.766774 |
| Glycerophospholipids | 1962.2875                        | 1941.2143                        |          |
| PC.ae.C32.1          | (95% CI 1788.0148 - 2136.5602)   | (95% CI 1794.7755 - 2087.6531)   | 0.842423 |
| Glycerophospholipids | 496.75                           | 458.5493                         |          |
| PC.ae.C32.2          | (95% CI 459.39 - 534.11)         | (95% CI 427.6599 - 489.4387)     | 0.118968 |
| Glycerophospholipids | 6247.075                         | 6461.7606                        |          |
| PC.ae.C34.1          | (95% CI 5902.1273 - 6592.0227)   | (95% CI 6027.2765 - 6896.2447 )  | 0.450872 |
| Glycerophospholipids | 7659.7125                        | 8234.493                         |          |
| PC.ae.C34.2          | (95% CI 7150.7521 - 8168.6729)   | (95% CI 7609.7149 - 8859.2711 )  | 0.156834 |
| Glycerophospholipids | 5057.775                         | 5134.3944                        |          |
| PC.ae.C34.3          | (95% CI 4670.2545 - 5445.2955)   | (95% CI 4677.1182 - 5591.6706)   | 0.813931 |
| Glycerophospholipids | 590.5125                         | 605.662                          |          |
| PC.ae.C36.0          | (95% CI 546.4987 - 634.5263)     | (95% CI 495.3703 - 715.9537)     | 0.803479 |
| Glycerophospholipids | 5110.2                           | 5060.1429                        |          |
| PC.ae.C36.1          | (95% CI 4705.5326 - 5514.8674)   | (95% CI 4697.9736 - 5422.3122)   | 0.847816 |
| Glycerophospholipids | 8481.625                         | 8715.8571                        |          |
| PC.ae.C36.2          | (95% CI 7812.6769 - 9150.5731)   | (95% CI 8058.1548 - 9373.5594)   | 0.634967 |
| Glycerophospholipids | 4989.775                         | 5516.3521                        |          |
| PC.ae.C36.3          | (95% CI 4643.6637 - 5335.8863)   | (95% CI 5079.1649 - 5953.5393)   | 0.060857 |
| Glycerophospholipids | 15137.6125                       | 15786.3714                       |          |
| PC.ae.C36.4          | (95% CI 14096.7031 - 16178.5219) | (95% CI 14657.0129 - 16915.7299) | 0.410425 |
| Glycerophospholipids | 10000.1                          | 9352.5352                        |          |
| PC.ae.C36.5          | (95% CI 9360.9453 - 10639.2547)  | (95% CI 8694.2888 - 10010.7816)  | 0.163502 |
| Glycerophospholipids | 363.6683                         | 253.46                           |          |
| PC.ae.C38.1          | (95% CI 83.7939 - 643.5427)      | (95% CI 153.9858 - 352.9342)     | 0.472775 |
| Glycerophospholipids | 1071.1875                        | 1155.7887                        |          |
| PC.ae.C38.2          | (95% CI 876.5941 - 1265.7809)    | (95% CI 894.9811 - 1416.5963)    | 0.613557 |
| Glycerophospholipids | 2393.1625                        | 2457.1549                        |          |
| PC.ae.C38.3          | (95% CI 2134.4965 - 2651.8285)   | (95% CI 2297.2408 - 2617.069)    | 0.698342 |
| Glycerophospholipids | 9345.9875                        | 10152.7324                       |          |
| PC.ae.C38.4          | (95% CI 8824.3929 - 9867.5821)   | (95% CI 9501.8143 - 10803.6505)  | 0.056673 |
| Glycerophospholipids | 14023.25                         | 13881.6197                       |          |
| PC.ae.C38.5          | (95% CI 13208.0733 - 14838.426 ) | (95% CI 13029.6974 - 14733.542)  | 0.793575 |
| Glycerophospholipids | 6516.375                         | 6244.8169                        |          |
| PC.ae.C38.6          | (95% CI 6125.4466 - 6907.3034)   | (95% CI 5829.9827 - 6659.6511)   | 0.33361  |
| Glycerophospholipids | 1028.8125                        | 919.5143                         |          |
| PC.ae.C40.1          | (95% CI 932.2061 - 1125.4189)    | (95% CI 859.1746 - 979.854)      | 0.063922 |
| Glycerophospholipids | 1353.775                         | 1421.4789                        |          |
| PC.ae.C40.2          | (95% CI 1216.7212 - 1490.8288)   | (95% CI 1260.8924 - 1582.0654)   | 0.530456 |

|                      |                                   |                                   |          |
|----------------------|-----------------------------------|-----------------------------------|----------|
| Glycerophospholipids | 572.2                             | 626.7746                          |          |
| PC.ae.C40.3          | (95% CI 546.1666 - 598.2334)      | (95% CI 566.4923 - 687.0569)      | 0.091534 |
| Glycerophospholipids | 1379.55                           | 1485.7887                         |          |
| PC.ae.C40.4          | (95% CI 1304.7507 - 1454.3493)    | (95% CI 1396.2462 - 1575.3312)    | 0.073128 |
| Glycerophospholipids | 2369.5375                         | 2469.8169                         |          |
| PC.ae.C40.5          | (95% CI 2260.2096 - 2478.8654)    | (95% CI 2293.3157 - 2646.3181)    | 0.334997 |
| Glycerophospholipids | 3527.9625                         | 3464.5352                         |          |
| PC.ae.C40.6          | (95% CI 3319.9962 - 3735.9288)    | (95% CI 3194.9875 - 3734.0829)    | 0.702044 |
| Glycerophospholipids | 391.1786                          | 413.725                           |          |
| PC.ae.C42.0          | (95% CI 309.1357 - 473.2215)      | (95% CI 282.6848 - 544.7652)      | 0.795569 |
| Glycerophospholipids | 266.08                            | 253.4429                          |          |
| PC.ae.C42.1          | (95% CI 249.7442 - 282.4158)      | (95% CI 225.0806 - 281.8052)      | 0.421277 |
| Glycerophospholipids | 453.6125                          | 444.1972                          |          |
| PC.ae.C42.2          | (95% CI 396.5162 - 510.7088)      | (95% CI 405.9513 - 482.4431)      | 0.773234 |
| Glycerophospholipids | 584.1875                          | 549.6479                          |          |
| PC.ae.C42.3          | (95% CI 499.6528 - 668.7222)      | (95% CI 496.6083 - 602.6875)      | 0.489653 |
| Glycerophospholipids | 549.1282                          | 603.5294                          |          |
| PC.ae.C42.4          | (95% CI 504.4966 - 593.7598)      | (95% CI 559.8266 - 647.2322)      | 0.092739 |
| Glycerophospholipids | 1509.2375                         | 1566.2113                         |          |
| PC.ae.C42.5          | (95% CI 1398.6432 - 1619.8318)    | (95% CI 1471.2923 - 1661.1303)    | 0.452173 |
| Glycerophospholipids | 74.4938                           | 113.8971                          |          |
| PC.ae.C44.3          | (95% CI 69.7341 - 79.2535)        | (95% CI 59.9049 - 167.8893)       | 0.128614 |
| Glycerophospholipids | 353.325                           | 343.338                           |          |
| PC.ae.C44.4          | (95% CI 259.429 - 447.221)        | (95% CI 315.0028 - 371.6732)      | 0.84461  |
| Glycerophospholipids | 1350.15                           | 1426.5143                         |          |
| PC.ae.C44.5          | (95% CI 1259.1496 - 1441.1504)    | (95% CI 1322.3885 - 1530.6401)    | 0.275664 |
| Glycerophospholipids | 904.3875                          | 948.5493                          |          |
| PC.ae.C44.6          | (95% CI 834.4996 - 974.2754)      | (95% CI 861.4148 - 1035.6838)     | 0.436031 |
| Sphingolipids        | 100737.6375                       | 99224.338                         |          |
| SM.C16.0             | (95% CI 95679.9984 - 105795.2766) | (95% CI 92138.5688 - 106310.1072) | 0.714396 |
| Sphingolipids        | 14226.7                           | 13382.7042                        |          |
| SM.C16.1             | (95% CI 13425.0443 - 15028.3557)  | (95% CI 12460.2143 - 14305.1941)  | 0.162311 |
| Sphingolipids        | 24655.65                          | 23006.4366                        |          |
| SM.C18.0             | (95% CI 22811.1951 - 26500.1049)  | (95% CI 20958.1333 - 25054.7399)  | 0.234845 |
| Sphingolipids        | 11336.5375                        | 10500.7042                        |          |
| SM.C18.1             | (95% CI 10635.1092 - 12037.9658)  | (95% CI 9722.6177 - 11278.7907)   | 0.111441 |
| Sphingolipids        | 275.6228                          | 289.9314                          |          |
| SM.C20.2             | (95% CI 248.6863 - 302.5593)      | (95% CI 200.7187 - 379.1441)      | 0.759218 |
| Sphingolipids        | 20245.7625                        | 20607.169                         |          |
| SM.C24.0             | (95% CI 17585.9426 - 22905.5824)  | (95% CI 17096.9232 - 24117.4148)  | 0.883505 |
| Sphingolipids        | 137.3138                          | 142.4141                          |          |
| SM.C26.0             | (95% CI 77.5855 - 197.0421)       | (95% CI 95.5245 - 189.3037)       | 0.904056 |
| Sphingolipids        | 390.7625                          | 452.0563                          |          |
| SM.C26.1             | (95% CI 348.9633 - 432.5617)      | (95% CI 290.9744 - 613.1382)      | 0.450355 |
| Sphingolipids        | 4600.2625                         | 4680.0563                         |          |
| SM.OH.C14.1          | (95% CI 4054.6319 - 5145.8931)    | (95% CI 4247.0782 - 5113.0344)    | 0.833738 |
| Sphingolipids        | 2664.7625                         | 3049.3239                         |          |
| SM.OH.C16.1          | (95% CI 2454.5316 - 2874.9934)    | (95% CI 2456.0848 - 3642.563)     | 0.211839 |
| Sphingolipids        | 10615.35                          | 11791.5775                        |          |
| SM.OH.C22.1          | (95% CI 10030.0392 - 11200.6608)  | (95% CI 10230.7314 - 13352.4236)  | 0.150316 |
| Sphingolipids        | 10787.3625                        | 10692.7183                        |          |
| SM.OH.C22.2          | (95% CI 10202.2733 - 11372.4517)  | (95% CI 9736.7359 - 11648.7007)   | 0.845789 |
| Sphingolipids        | 1147.275                          | 1266.1127                         |          |
| SM.OH.C24.1          | (95% CI 983.7129 - 1310.8371)     | (95% CI 1015.2182 - 1517.0072)    | 0.431075 |

CI - confidence interval. Mean values together with the 95% confidence intervals of the means are presented.
